# Supplementary material for: Novel SnSxSe1−x nanocrystals with tunable band gap: experimental and first-principles calculations
Source: Royal Society of Chemistry journal article supplement (doi:10.1039/c1jm12968f), 2011-01-01
Supplement: c1jm12968f.pdf [file c1jm12968f.pdf]

## Supporting Information

### Novel $\text{SnS}_x\text{Se}_{1-x}$ Nanocrystals with Tunable Band Gap: Experimental and First-principles

#### Calculations

Hao Wei,<sup>\*a</sup> Yanjie Su,<sup>a</sup> Shangzhi Chen,<sup>b</sup> Yang Lin,<sup>b</sup> Zhi Yang,<sup>a</sup> Xiaoshuang Chen<sup>c</sup> and Yafei Zhang,<sup>\*a</sup>

<sup>a</sup> Key Laboratory for Thin Film and Microfabrication of the Ministry of Education, Institute of Micro/Nano Science and Technology, Shanghai Jiao Tong University, Shanghai 200240, PR China. Tel.: +86 21 3420 5665; Fax: +86 21 3420 5665. E-mail address: haowei@sjtu.edu.cn (H. Wei), yfzhang@sjtu.edu.cn (Y. Zhang) .

<sup>b</sup> School of Materials Science and Engineering, Shanghai Jiao Tong University, Shanghai 200240, PR China

<sup>c</sup> National Laboratory for Infrared Physics, Shanghai Institute of Technical Physics, Chinese Academy of Sciences, 200083 Shanghai, PR China

#### Experimental Section

**I. Materials.** Stannous oxide ( $\text{SnO}$ , >90.0%), selenium ( $\text{Se}$ , >99.95%), sulfur ( $\text{S}$ , >99.5%), octadecene (90%), oleic acid (OA, 90%), oleylamine (OLA, 70%) and trioctylphosphine (TOP, >97%) were purchased from Aladdin, without further purification.

**II. Typical synthesis of  $\text{SnS}_x\text{Se}_{1-x}$  nanocrystals.** 2 mmol  $\text{SnO}$ , 4 mL octadecene, and 5 mL OA were added to a 100 mL two-neck flask followed with vacuum pumping and  $\text{N}_2$  bubbling. Then the solution was kept at 260 °C for 1 h. Meanwhile, TOP/Se solution, OLA/S solution were added to two 100 mL two-neck flask followed with vacuum pumping and  $\text{N}_2$  bubbling. The Se and S ratio was tuned to different specific values, while the total amount was kept at 2 mmol. Then both solutions were kept at 60°C for 1 h. When the two solutions were completely dissolved, they were rapidly injected into the first flask containing  $\text{SnO}$  solution. The temperature was then raised to 270 °C and kept for the range of 150 seconds to 500 seconds under vigorous stirring. The product was purified by standard polar/nonpolar solvent precipitation technique, using a high-speed centrifuge.

**III. Characterization.** The crystal structure of  $\text{SnSSe}$  nanocrystals was characterized by powder X-ray diffraction (XRD) using  $\text{Cu K}\alpha$  radiation,  $\lambda=1.54 \text{ \AA}$ . An Oxford INCA energy-dispersive X-ray spectroscopy (EDS) detector was used to analyse element composition and proportion. Transmission electron microscopy (TEM) and selected area electron diffraction (SAED) images were taken with a JEM 2100 microscope at 200 kV accelerating voltage. UV-vis absorption spectra were carried out to evaluate the optical properties of  $\text{SnSSe}$  nanocrystals by using a Lambda 20 UV-vis spectrometer.

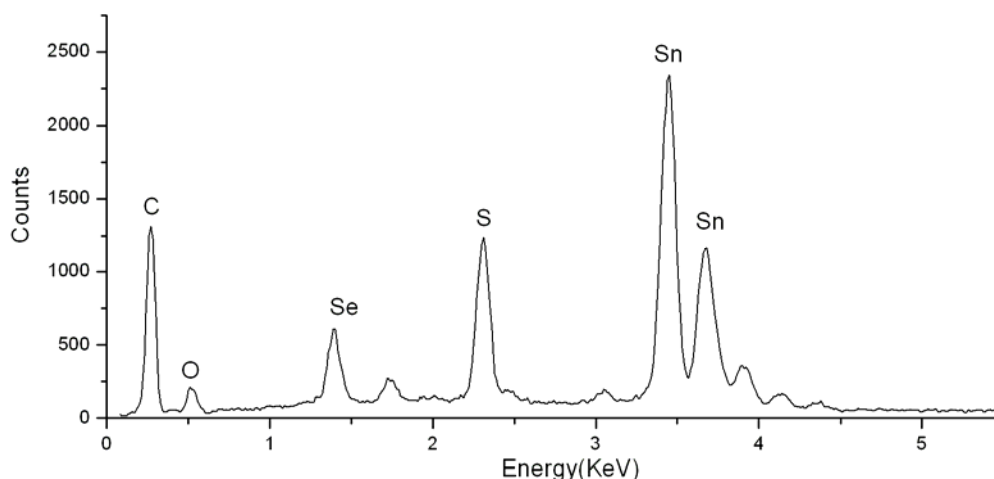

**Fig. S1.** EDS spectrum of SnS<sub>x</sub>Se<sub>1-x</sub> (x=0.75) nanocrystals.

| Serials | S/(S+Se) | Atomic (%) |      |      |
|---------|----------|------------|------|------|
|         |          | Sn         | S    | Se   |
| I       | 0.09     | 53.8       | 4.3  | 41.9 |
| II      | 0.22     | 52.4       | 10.5 | 37.1 |
| III     | 0.43     | 52.4       | 20.4 | 27.2 |
| IV      | 0.56     | 51.8       | 26.9 | 21.3 |
| V       | 0.78     | 51.0       | 38.3 | 10.7 |
| VI      | 0.89     | 51.0       | 43.9 | 5.1  |

**Table S1.** Chemical compositions of SnSSe nanocrystals determined from EDS analysis.

**Table S1.** shows the chemical stoichiometries of Six SnSSe samples measured by an Oxford INCA energy-dispersive X-ray spectroscopy (EDS) detector. The whole samples have an S/(S+Se) ratio of 0.09, 0.22, 0.43, 0.56, 0.78, 0.89. Considering the  $\pm 2\%$  uncertainty in the elemental composition data analyzed by EDS, the average compositions of the nanocrystals for the six samples calculated from Table SI.1 are SnS<sub>0.08</sub>Se<sub>0.78</sub>, SnS<sub>0.20</sub>Se<sub>0.71</sub>, SnS<sub>0.39</sub>Se<sub>0.52</sub>, SnS<sub>0.52</sub>Se<sub>0.41</sub>, SnS<sub>0.75</sub>Se<sub>0.21</sub> and SnS<sub>0.86</sub>Se<sub>0.10</sub>, respectively.

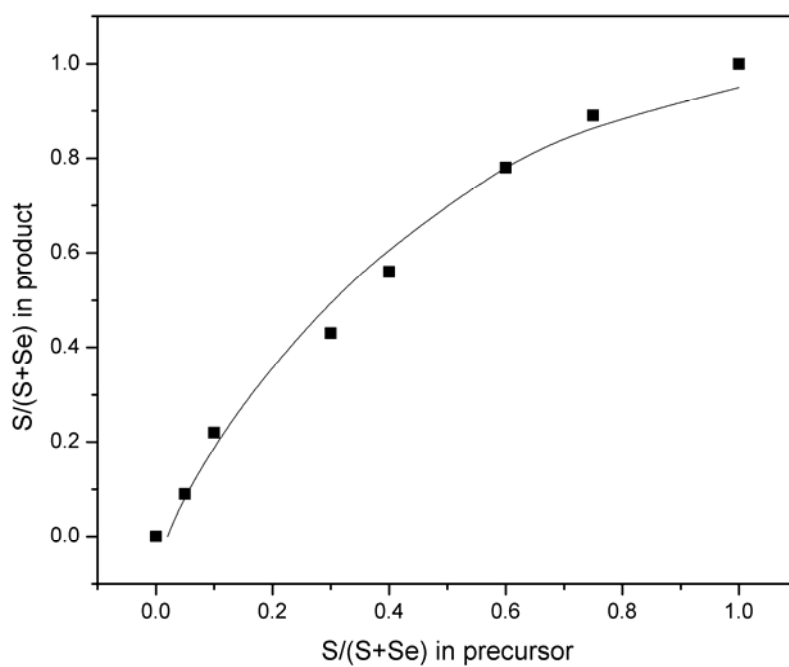

**Fig. S2.** Energy-dispersive X-ray spectroscopy (EDS) is used to measure the relative amount of sulfur in the product versus the relative amount of sulfur in the precursor injection solution.

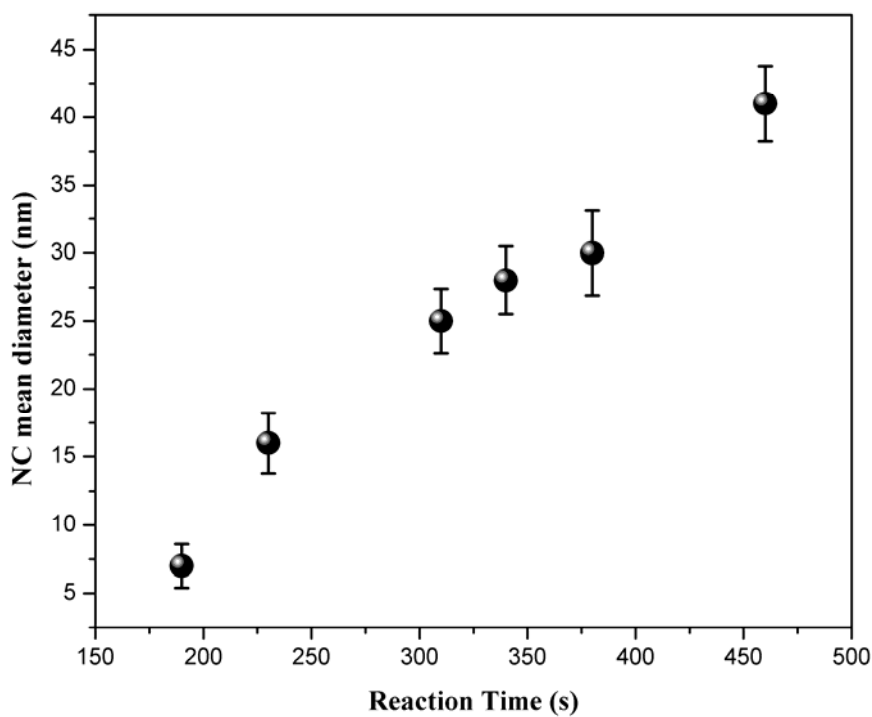

**Fig. S3.** Dependence of final particle size on the reaction time. The error bars describe the distribution of particle sizes within the sample, not the uncertainty in the mean.

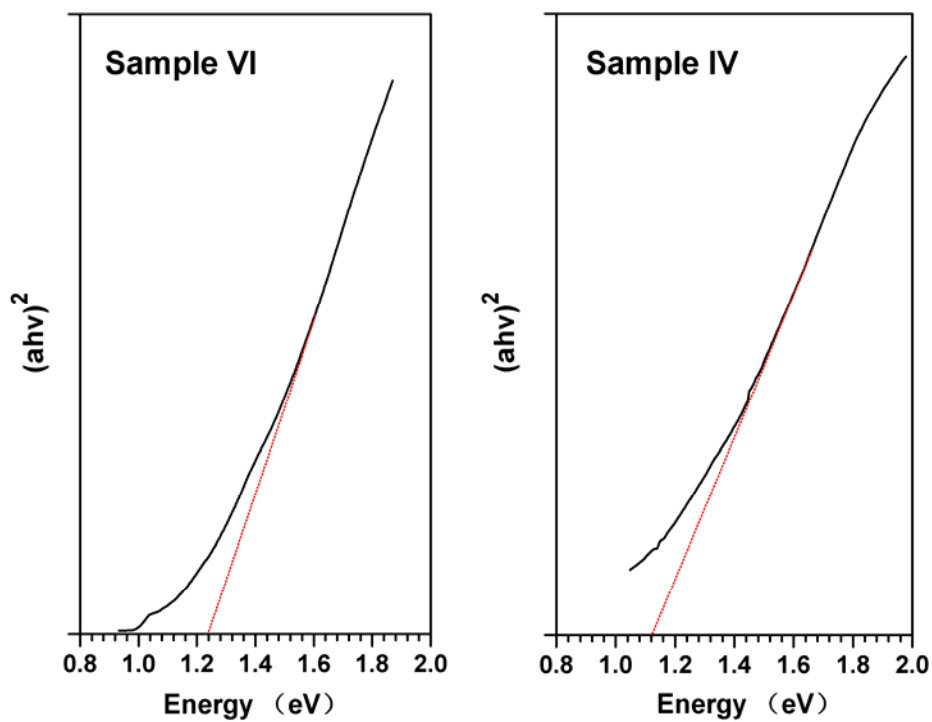

**Fig. S4.** Obtained band gap energies of Sample VI and Sample IV.
